# Supplementary material for: Density Dependent Refueling of Migratory Songbirds During Stopover Within an Urbanizing Coastal Landscape
Source: Frontiers journal article supplement (doi:10.3389/fevo.2022.837790), 2022-03-01
Supplement: Data_Sheet_1.pdf [file Data_Sheet_1.pdf]

## Supplementary Material

### Density dependent refueling of migratory songbirds during stopover within an urbanizing coastal landscape

Emily B. Cohen, Jill M. Lafleur, Frank R. Moore

#### 1.1 Supplementary Tables

**Supplementary Table 1.** Species and foraging groups detected on transect surveys during 2011 and 2012 spring migration in paired small and large forested habitat patches along the coast of Mississippi, U.S..

| Species                   | Foraging group   | Large Sites |     | Small Sites |     | Total |
|---------------------------|------------------|-------------|-----|-------------|-----|-------|
|                           |                  | DAV         | SHE | DON         | HEL |       |
| American Redstart         | Canopy/Subcanopy | 1           |     | 2           |     | 3     |
| Black-and-white Warbler   | Canopy/Subcanopy | 3           |     |             |     | 3     |
| Blackpoll Warbler         | Canopy/Subcanopy |             |     | 2           |     | 2     |
| Blue Grosbeak             | Canopy/Subcanopy | 2           |     |             | 1   | 3     |
| Blue-winged Warbler       | Canopy/Subcanopy |             |     |             | 2   | 2     |
| Eastern Kingbird          | Canopy/Subcanopy | 5           |     | 2           | 3   | 10    |
| Great Crested Flycatcher  | Canopy/Subcanopy | 30          | 17  | 12          | 13  | 72    |
| Hooded Warbler            | Understory       | 9           | 4   | 5           | 3   | 21    |
| Indigo Bunting            | Understory       |             | 1   | 1           | 4   | 6     |
| Kentucky Warbler          | Understory       | 1           |     | 1           |     | 2     |
| Magnolia Warbler          | Canopy/Subcanopy | 2           | 1   | 2           |     | 5     |
| Northern Parula           | Canopy/Subcanopy | 5           | 1   |             | 1   | 7     |
| Northern Waterthrush      | Ground           |             |     | 3           | 1   | 4     |
| Orchard Oriole            | Canopy/Subcanopy |             |     | 3           | 3   | 6     |
| Ovenbird                  | Ground           | 2           | 1   |             | 2   | 5     |
| Painted Bunting           | Canopy/Subcanopy |             |     |             | 1   | 1     |
| Prothonotary Warbler      | Canopy/Subcanopy | 3           | 4   | 6           | 3   | 16    |
| Red-eyed Vireo            | Canopy/Subcanopy | 4           | 3   | 1           |     | 8     |
| Rose-breasted Grosbeak    | Canopy/Subcanopy |             |     | 1           | 2   | 3     |
| Ruby-throated Hummingbird | Canopy/Subcanopy | 1           | 2   | 5           | 7   | 15    |
| Scarlet Tanager           | Canopy/Subcanopy |             | 1   | 1           | 1   | 3     |
| Summer Tanager            | Canopy/Subcanopy |             |     | 3           |     | 3     |
| Swainson's Warbler        | Ground           |             | 1   |             |     | 1     |
| Swainson's Thrush         | Ground           |             |     | 1           | 2   | 3     |
| Unknown thrush species    | Ground           | 1           |     | 4           |     | 5     |
| Wood Thrush               | Ground           | 3           | 3   | 3           |     | 9     |

|                           |                  |    |    |    |    |     |
|---------------------------|------------------|----|----|----|----|-----|
| Worm-eating Warbler       | Canopy/Subcanopy | 2  | 2  |    | 1  | 5   |
| Yellow Warbler            | Canopy/Subcanopy | 1  |    | 2  | 2  | 5   |
| Yellow-bellied Flycatcher | Canopy/Subcanopy |    |    | 1  |    | 1   |
| Yellow-billed Cuckoo      | Canopy/Subcanopy |    | 2  | 1  |    | 3   |
| Yellow-throated Vireo     | Canopy/Subcanopy | 2  | 1  |    |    | 3   |
| Yellow-throated Warbler   | Canopy/Subcanopy | 2  |    | 1  |    | 3   |
| <b>Total</b>              |                  | 73 | 50 | 63 | 52 | 238 |

**Supplementary Table 2.** Species composition of birds tested for refueling performance during 2011 and 2012 spring migration in paired small and large habitat patches along the coast of Mississippi, U.S..

|                                                           | Large Sites |      | Small Sites |      |              |
|-----------------------------------------------------------|-------------|------|-------------|------|--------------|
|                                                           | DAV         | SHE  | DON         | HEL  |              |
| Net hours                                                 | 999         | 704  | 345         | 642  |              |
| Capture Rates                                             | 0.01        | 0.02 | 0.13        | 0.05 |              |
| <b>Species</b>                                            |             |      |             |      | <b>Total</b> |
| American Redstart ( <i>Setophaga ruticilla</i> )          |             | 1    |             | 2    | 3            |
| Black-and-white Warbler ( <i>Mniotilta varia</i> )        |             |      |             | 1    | 1            |
| Eastern Wood Pewee ( <i>Contopus virens</i> )             |             |      |             | 1    | 1            |
| Hooded Warbler ( <i>Setophaga citrina</i> )               | 1           | 2    | 4           |      | 7            |
| Great Crested Flycatcher ( <i>Myiarchus crinitus</i> )    | 2           |      | 1           | 1    | 4            |
| Grey-cheeked Thrush ( <i>Catharus minimus</i> )           |             | 1    | 1           | 5    | 7            |
| Indigo Bunting ( <i>Passerina cyanea</i> )                | 1           |      | 4           |      | 5            |
| Louisiana Waterthrush ( <i>Parkesia motacilla</i> )       | 1           |      | 3           |      | 4            |
| Magnolia Warbler ( <i>Setophaga magnolia</i> )            |             |      |             | 1    | 1            |
| Northern Parula ( <i>Setophaga americana</i> )            |             |      |             | 1    | 1            |
| Northern Waterthrush ( <i>Parkesia noveboracensis</i> )   |             |      | 2           | 2    | 4            |
| Orchard Oriole ( <i>Icterus spurius</i> )                 |             |      | 2           | 2    | 4            |
| Ovenbird ( <i>Seiurus aurocapilla</i> )                   | 1           | 4    | 4           | 4    | 13           |
| Painted Bunting ( <i>Passerina ciris</i> )                |             |      | 2           |      | 2            |
| Prothonotary Warbler ( <i>Protonotaria citrea</i> )       |             |      | 3           | 1    | 4            |
| Red-eyed Vireo ( <i>Vireo olivaceus</i> )                 |             | 4    | 1           | 1    | 6            |
| Rose-breasted Grosbeak ( <i>Pheucticus ludovicianus</i> ) |             |      | 1           | 1    | 2            |
| Summer Tanager ( <i>Piranga rubra</i> )                   |             | 2    |             | 2    | 4            |
| Swainson's Thrush ( <i>Catharus ustulatus</i> )           | 4           |      | 4           | 4    | 12           |
| Veery ( <i>Catharus fuscescens</i> )                      | 1           |      | 1           | 3    | 5            |
| Wood Thrush ( <i>Hylocichla mustelina</i> )               | 2           |      | 6           |      | 8            |
| Worm-eating Warbler ( <i>Helmitheros vermivorum</i> )     | 1           | 1    | 2           |      | 4            |
| Yellow-breasted Chat ( <i>Icteria virens</i> )            |             |      | 2           | 2    | 4            |
| Yellow-billed Cuckoo ( <i>Coccyzus americanus</i> )       |             | 1    |             |      | 1            |
| <b>Total</b>                                              | 14          | 16   | 43          | 34   | 107          |
